# Supplementary material for: Biclustering reveals potential knee OA phenotypes in exploratory analyses: Data from the Osteoarthritis Initiative
Source: PubMed Central journal article supplement (PMC9129051; doi:10.1371/journal.pone.0266964), 2022-05-24
Supplement: pone.0266964.s001.pdf [file pone.0266964.s001.pdf]

**S1 Table. OAI Variable descriptions and key to NDA dataset**

| Description of the variable                                                                                                           | OAI variable used                            | NDA variable used               |
|---------------------------------------------------------------------------------------------------------------------------------------|----------------------------------------------|---------------------------------|
| Female sex                                                                                                                            | P02SEX                                       | gender                          |
| Hispanic or Latino, self-reported                                                                                                     | P02HISP                                      | ethnicity                       |
| White or Caucasian race                                                                                                               | P02RACE                                      | race                            |
| Black or African American race                                                                                                        | P02RACE                                      | race                            |
| Asian race                                                                                                                            | P02RACE                                      | race                            |
| SF-12 Physical Health Summary                                                                                                         | V00HSPSS                                     | physical                        |
| SF-12 Mental Health Summary                                                                                                           | V00HSMSS                                     | mental                          |
| Marital status: Widowed                                                                                                               | V00MARITST                                   | curr_marital_st                 |
| Marital status: Divorced                                                                                                              | V00MARITST                                   | curr_marital_st                 |
| Marital status: Separated                                                                                                             | V00MARITST                                   | curr_marital_st                 |
| Marital status: Never married                                                                                                         | V00MARITST                                   | curr_marital_st                 |
| Doing unpaid work for family business                                                                                                 | V00CEMPLY                                    | cmemploy                        |
| Not working in part due to health                                                                                                     | V00CEMPLY                                    | cmemploy                        |
| Not working other reasons                                                                                                             | V00CEMPLY                                    | cmemploy                        |
| Currently employed                                                                                                                    | V00CUREMP                                    | curemp                          |
| Yearly income >50X (calc)                                                                                                             | V00INCOME2                                   | income2                         |
| Have medical insurance                                                                                                                | V00MEDINS                                    | medins                          |
| Age (calc, used for study eligibility)                                                                                                | V00AGE                                       | ageyears                        |
| Highest grade or year of school completed (calc)                                                                                      | V00EDCV                                      | edcv                            |
| How many alcoholic drinks in typical week, past 12 months                                                                             | V00DRNKAMT                                   | drnkamt                         |
| Comorbidity Score                                                                                                                     | V00COMORB                                    | comorb                          |
| Center for Epidemiologic Studies Depression Scale (CES-D) Score (calc)                                                                | V00CESD                                      | cesd_score                      |
| Physical Activity Scale for the Elderly                                                                                               | V00PASE                                      | pase                            |
| Blood pressure: systolic (mm Hg)                                                                                                      | V00BPSYS                                     | bpsys                           |
| Blood pressure: diastolic (mm Hg)                                                                                                     | V00BPDIAS                                    | bgpdias                         |
| Body mass index (calc)                                                                                                                | P01BMI                                       | bmi                             |
| Fallen and landed on floor or ground, past 12 months                                                                                  | V00FALL                                      | fall                            |
| Smoked at least 100 cigarettes (5 packs) in entire life                                                                               | V00SMOKE                                     | smoke                           |
| In the past, did drink more beer, wine or liquor than now                                                                             | V00DRKMORE                                   | drkmore                         |
| Total number of medications recorded                                                                                                  | V00RX30NUM, V00RX30                          | rx30num, rx30                   |
| Bring in or identify ALL prescription medications taken, past 30 days                                                                 | V00RX30                                      | rx30                            |
| Bring in or identify SOME prescription medications taken, past 30 days                                                                | V00RX30                                      | rx30                            |
| Did not take any medications, past 30 days                                                                                            | V00RX30                                      | rx30                            |
| Used analgesic in last 30 days                                                                                                        | V00RXANALG                                   | rxanalg                         |
| Used narcotic analgesic in last 30 days                                                                                               | V00RXNARC                                    | rxnarc                          |
| Injected corticosteroid in last 30 days                                                                                               | V00RXISTRD                                   | rxistrd                         |
| Used COX-II inhibitor in last 30 days                                                                                                 | V00RXCX2                                     | rxcox2                          |
| Used NSAID in last 30 days                                                                                                            | V00RXNSAID                                   | rxnsaid                         |
| Ever had hip replacement surgery where all or part of joint was replaced                                                              | P01HRS                                       | hrs                             |
| Doctor ever said participant broke or fractured bone after age 45                                                                     | V00BONEFX                                    | bonefx                          |
| Doctor ever said participant fractured spine or vertebrae                                                                             | V00SPNFX                                     | spnfx                           |
| Repeated chair stand: pace in stands/sec (calc)                                                                                       | V00CSPACE                                    | cspase                          |
| Single chair stand                                                                                                                    | V00CSTGSL                                    | cstsgl                          |
| Able to complete 5 repeated chair stands                                                                                              | V00CS5                                       | cs5                             |
| 20-meter walk: pace (m/sec) (calc)                                                                                                    | V0020MPACE                                   | w20mpace                        |
| 400 meter walk                                                                                                                        | V00400MTIM                                   | w400mtim                        |
| Family history of TKR                                                                                                                 | P02FAMHKKR                                   | famhkk                          |
| Presence of hip pain (right), aching or stiffness: any, past 12 months (includes pain in groin and in front and sides of upper thigh) | P01HPNR12 1: Yes                             | hpr12                           |
| Presence hip pain (left), aching or stiffness: any, past 12 months (includes pain in groin and in front and sides of upper thigh)     | P01HPNL12 1: Yes                             | hprl12                          |
| Presence of back pain (any), past 30 days                                                                                             | P01BP30                                      | bp30                            |
| Presence of right hip pain, aching or stiffness: more than half the days of a month, past 12 months (calc)                            | P01HPR12CV                                   | hpr12cv                         |
| Presence of left hip pain, aching or stiffness: more than half the days of a month, past 12 months (calc)                             | P01HPL12CV                                   | hpl12cv                         |
| <b>Ever injured badly enough to limit ability to walk for at least two days</b>                                                       | P01INIL, P01INJR                             | injl, injr                      |
| <b>Ever have knee surgery or arthroscopy</b>                                                                                          | P01KSURGL, P01KSURGR                         | ksurgl, ksurg                   |
| <b>Ever have knee arthroscopy (where they put a scope in knee)</b>                                                                    | P01ARTL, P01ARTR, P01KSURGL, P01KSURGR       | artl, artr, ksurgl, ksurg       |
| <b>At least one arthroscopy to repair knee injury</b>                                                                                 | P01ARTLINJ, P01ARTRINJ, P01KSURGL, P01KSURGR | artlinj, artrinj, ksurgl, ksurg |
| <b>Ever have meniscectomy (where they repaired or cut away torn meniscus or cartilage)</b>                                            | P01MENL, P01MENR, P01KSURGL, P01KSURGR       | menl, menr, ksurgl, ksurg       |
| <b>At least one meniscectomy to repair an injury</b>                                                                                  | P01MENLINJ, P01MENRINJ, P01KSURGL, P01KSURGR | menlinj, menrinj, ksurgl, ksurg |
| <b>Ever have ligament repair surgery</b>                                                                                              | P01LRL, P01LRR, P01KSURGL, P01KSURGR         | lrl, lrr, ksurgl, ksurg         |
| WOMAC Pain Score (calc)                                                                                                               | V00WOMKPL, V00WOMKPR                         | womkpl, womkpr                  |
| KOOS Pain Score                                                                                                                       | V00KOOSKPL, V00KOOSKPR                       | kooskpl, kooskpr                |
| WOMAC Stiffness Score (calc)                                                                                                          | V00WOMSTFL, V00WOMSTFR                       | womstfl, womstfr                |
| KOOS Symptoms Score (right/                                                                                                           | V00KOOSYML, V00KOOSYM                        | koosyml, koosym                 |
| WOMAC Disability Score (calc)                                                                                                         | V00WOMADLL, V00WOMADLR                       | womadll, womadir                |
| Isometric strength: left leg weight (N)                                                                                               | V00LWGLT, V00LWGR                            | lwtg, llwtg                     |
| Isometric strength: left knee extension, severity of pain (calc)                                                                      | V00LEXP1CV, V00REXP1CV                       | lexp1cv, rexp1cv                |
| Isometric strength: right knee flexion, severity of pain (calc)                                                                       | V00LFXP1CV, V00RFXP1CV                       | lfxp1cv, rfxp1cv                |
| Right knee exam: flexion contracture/hyperextension, degrees (contracture positive) (calc)                                            | V00LKFHDEG, V00RFHDEG                        | rkhdeg, lkfhdeg                 |
| Knee exam: alignment, degrees (valgus negative) (calc)                                                                                | V00LKALNMT, V00RKALNMT                       | lkalnmt, rkalnmt                |
| Flexion MAX Force                                                                                                                     | V00rfmaxf, V00lrfmaxf                        | rmaxf, lrfmaxf                  |
| Flexion Speed of Force Relaxation                                                                                                     | V00lrfSR, V00lrfSR                           | lrfsr, rfsr                     |
| Extension Speed of Force Production                                                                                                   | V00lrfSP, V00lrfSP                           | resfp, lesfp                    |
| Extension Speed of Force Relaxation                                                                                                   | V00lrfSR, V00lrfSR                           | resfr, lesfr                    |
| Flexion Speed of Force Production                                                                                                     | V00lrfSP, V00lrfSP                           | lfsfp, rfsfp                    |
| Knee pain, aching or stiffness: any, past 12 months                                                                                   | P01KPNL12, P01KPNR12                         | kpnl12, pnr12                   |
| Knee exam: presence of patellar quadriceps tendinitis, pain/tenderness at any four sites                                              | V00LKPATPN, V00RKPATPN                       | lkpatpn, rkpatpn                |
| Knee exam: effusion, bulge sign positive                                                                                              | V00LKEFFB, V00RKEFFB                         | lkeffb, rkeffb                  |
| Knee exam: effusion, patellar tap positive                                                                                            | V00LKEFFPT, V00RKEFFPT                       | rkeffpt, lkeffpt                |
| Knee is to tender to examine                                                                                                          | V00LKEFFPT, V00RKEFFPT                       | rkeffpt, lkeffpt                |
| presence of knee flexion pain/tenderness on knee exam                                                                                 | V00RKRFKPN, V00LRFKPN                        | lkrfxpn, rkrfxpn                |
| Presence of lateral tibiofemoral pain/tenderness on knee exam                                                                         | V00LKTTPN, V00RKTTPN                         | lkttpn, rkttpn                  |
| Presence of medial tibiofemoral pain/tenderness on knee exam                                                                          | V00LKMTPN, V00RKMTPN                         | lkmtpn, rkmtpn                  |
| Presence of anserine bursa, pain/tenderness on exam                                                                                   | V00LKABPN, V00RKABPN                         | lkabpn, rkabpn                  |
| Knee exam: patello-femoral crepitus present on exam                                                                                   | V00LKPFCRE, V00RKPFcre                       | lkpfcrc, rkpfcrc                |
| Knee exam: patellar grind, painful or tender behind knee cap                                                                          | V00LKPDPN, V00RKDPDN                         | lkpdpn, rkpdpn                  |
| BL knee symptom status                                                                                                                | P01LKSX, P01RKSX                             | lksx, rksx                      |

**Bold: knee level variable**
