# Supplementary material for: Biclustering reveals potential knee OA phenotypes in exploratory analyses: Data from the Osteoarthritis Initiative
Source: PubMed Central journal article supplement (PMC9129051; doi:10.1371/journal.pone.0266964), 2022-05-24

## S1 Figures.

**Spaghetti plots** for the WOMAC pain score trajectory groups over time (t), showing how knees express the basic patterns (stable, up, down, irregular/erratic) with error, for: Group 1, Improvement trajectory (A); Group 2, Stable trajectory (B); Group 3, Worsening trajectory (C); Group 4, Irregular trajectory (D).

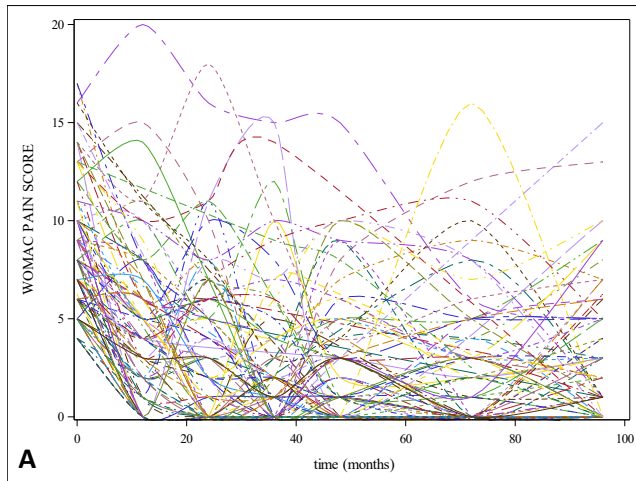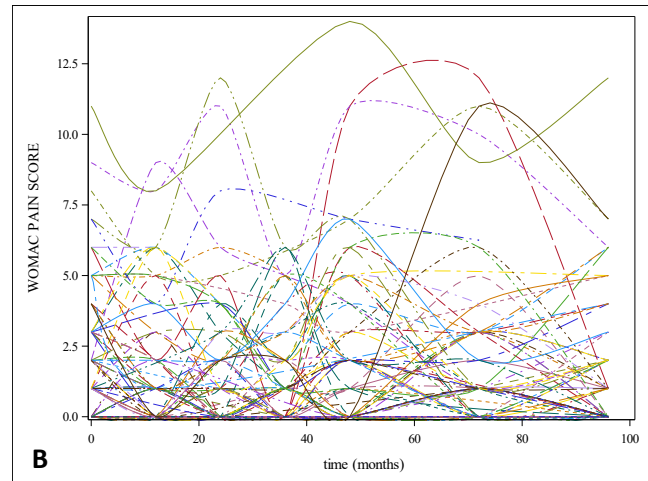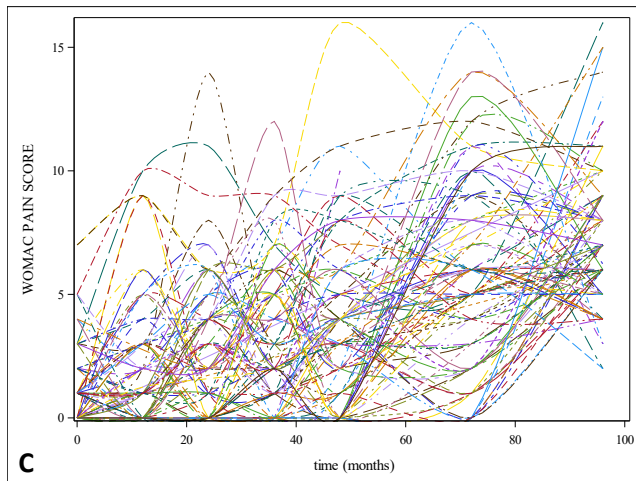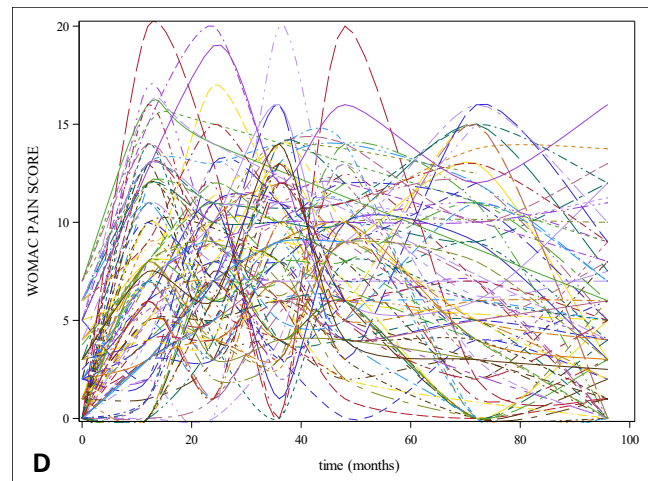

Supplement: pone.0266964.s002.pdf [file pone.0266964.s002.pdf]
